# Supplementary material for: A biopolymer-gated ionotronic junctionless oxide transistor array for spatiotemporal pain-perception emulation in nociceptor network
Source: Royal Society of Chemistry journal article supplement (doi:10.1039/d1nr07896h), 2022-01-01
Supplement: d1nr07896h1.pdf [file d1nr07896h1.pdf]

# Supporting Information

## Biopolymer-gated Ionotronic Junctionless Oxide Transistor Array for Spatiotemporal Pain-perceptual Emulation in Nociceptor Network

Yanran Li<sup>1#</sup>, Kai Yin<sup>1#</sup>, Yu Diao<sup>1</sup>, Mei Fang<sup>1</sup>, Junliang Yang<sup>1</sup>, Jian Zhang<sup>2</sup>, Hongtao Cao<sup>3</sup>, Xiaoliang Liu<sup>1\*</sup>, and Jie Jiang<sup>1\*</sup>

<sup>1</sup>Hunan Key Laboratory of Nanophotonics and Devices, School of Physics and Electronics, Central South University, 932 South Lushan Road, Changsha, Hunan 410083, P. R. China.

<sup>2</sup>School of Material Science and Engineering, Guilin University of Electronic Technology, Guilin, 541004, P. R. China.

<sup>3</sup>Laboratory of Advanced Nano Materials and Devices, Ningbo Institute of Materials Technology and Engineering, Chinese Academy of Sciences, Ningbo 315201, P. R. China.

E-mail: [xl\\_liu@csu.edu.cn](mailto:xl_liu@csu.edu.cn); [jiangjie@csu.edu.cn](mailto:jiangjie@csu.edu.cn)

#These authors contributed equally to this work.

### **Note S1. The mobile-ions-induced electric-double-layer (EDL) effect**

The fundamental characterizations of the ion-modulated at SA/ITO interfaces can be discussed by the following mechanism. In the previous reports, the SA has been demonstrated as a proton-conducting electrolyte.<sup>1,2</sup> Application of a voltage to the gate electrode causes migration and accumulation of ions at the gate-electrolyte and semiconductor-electrolyte interfaces, and then equal mirror-image charges are induced at the other side of the interface as shown Fig. 1c and d. The ions at these interfaces screen the charges in the gate electrolyte and cause accumulation of carriers in the semiconductor channel.<sup>3,4</sup> As shown in Fig. 1c, when  $V_{GS} > 0$ , the cations are electrically induced and consecutively accumulate at the SA/channel interface, which in turn causes accumulation of electrons in the channel layer to form a conductive channel through the cations/electron electrostatic coupling effect. When the  $V_{GS} < 0$ , the situation is just on the contrary as shown in Fig. 1d.

### **Note S2. Fitting analysis of the threshold voltage ( $V_{th}$ )**

The relationship between EPSC ( $I$ ) and voltage amplitude ( $U$ ) can be well fitted by a single exponential function:

$$I = I_1 e^{\frac{U}{U_0}} + I_0 \quad (S1)$$

where  $I_0$  and  $I_1$  represent two different constants. Furthermore, the fitting results can be summarized from Fig. S6 to Fig. S10.

### **Note S3. Two-phase sensitivity phenomenon of the biological nociceptors system.**

As shown in Fig.3(h), EPSC gradually grows larger as the spike number increases. This change can be qualified as two-phase. In the initial phase, EPSC increased rapidly. Then, it would response un-sharply like the previous stage after it approaches/exceeds the threshold current level. Based on this point, it is clearly observed that the two-phase sensitivity phenomenon of the biological nociceptors system can be mimic for our device. The above experimental data can be well fitted by using a double-exponential equation:

$$K = Q_1 e^{-\frac{t}{q_1}} + Q_2 e^{-\frac{t}{q_2}} + K_1 \quad (S2)$$

where  $K_1$  is EPSC constant, the  $Q_1$  and  $Q_2$  are original facilitation magnitudes of the two phases, and the  $q_1$  and  $q_2$  are respective characteristic response times of the two phases. The specific fitting results of these parameters are summarized in Table S2. From this table, we

found that  $q_1$  is greater than the  $q_2$ . Moreover, they can be well fitted with the following equation:

$$q_1 = r_1 U + r_0 \quad (S3)$$

where  $r_1$  and  $r_0$  are the slope factor and initial value of the  $q_1$ - $U$  relationship curve, respectively. Fitting the data to Equation (S3) yields  $r_1$  and  $r_0$  of 0.027s/V and 0.008s, respectively. The  $q_2$ - $U$  relationship can be also fitted using the following equation:

$$q_2 = r_3 U + r_2 \quad (S4)$$

where  $r_3$  and  $r_2$  are the slope factor and initial value of the  $q_2$ - $U$  relationship curve, respectively. Fitting the data to Equation (S4) yields  $r_3$  and  $r_2$  of 0.380s/V and 0.078s, respectively. The small time of first phase of sensitivity phenomenon in biological nociceptors system can be attributed to the protonic higher mobility and fast relaxation.<sup>3-4</sup> Nevertheless, with the stimulus time becomes larger, low mobility and slow relaxation of protons in sodium alginate bio-polymer electrolyte would occur, thus resulting to the slow phase with a large time constant. More interestingly, the value of  $q_1$  and  $q_2$  gradually grows larger as the voltage increases as shown the Table S3. This phenomenon can be attributed to electric double layer (EDL) modulation due to the residual ions at the SA/ITO interface.<sup>1,2</sup> Further increase in the amplitude leads to a larger output current and accordingly the time required to restore equilibrium position would increase, corresponding to a stronger harmful stimulus.<sup>5,6</sup> It is to be noted that, the  $r_3$  is greater than  $r_1$ , which implies that tuning the spike amplitude has a greater impact on  $q_2$  than  $q_1$ .

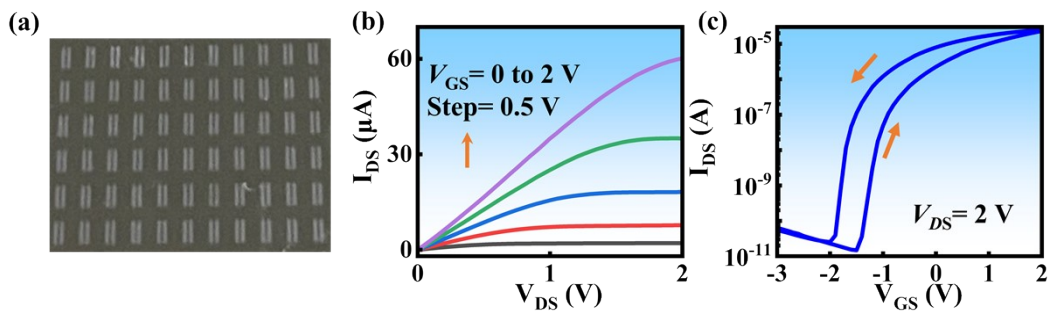

**Supplementary Fig. S1.** (a) The optical images of ITO devices. (b) The output curve of the ITO transistor. (c) The corresponding transfer curve of the ITO transistor with a fixed bias of  $V_{DS} = 2$  V.

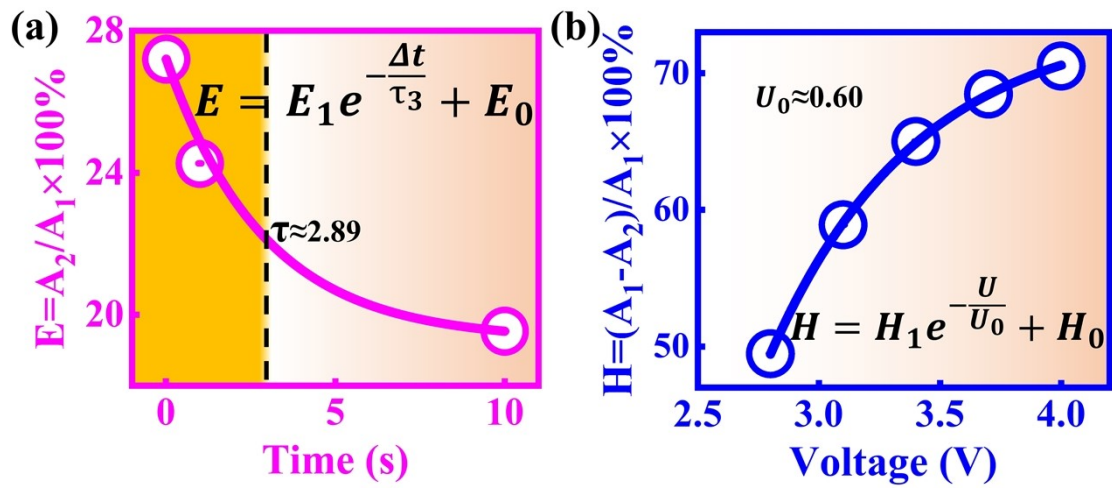

**Supplementary Fig. S2.** (a) The  $E$  index is a function of the time interval ( $\Delta t$ ) between two continuous. (b) The  $H$  index plotted as a function of electrical spiking voltage amplitude of the first stimulus train.

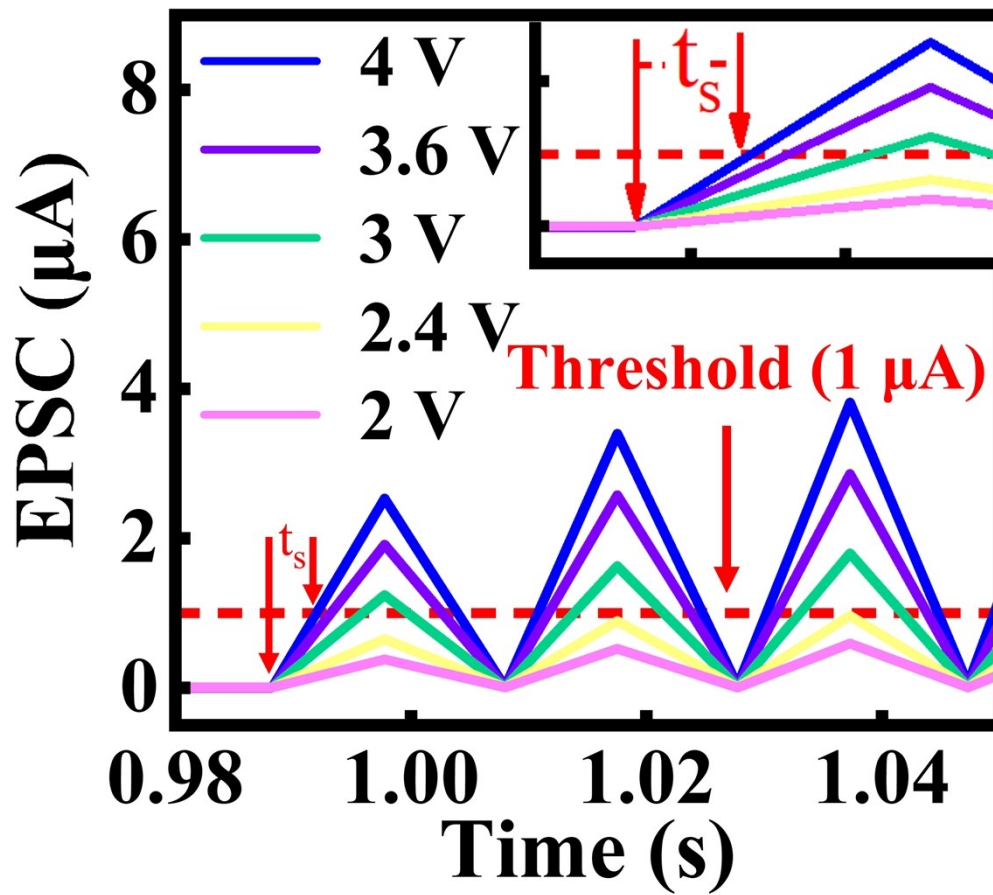

Supplementary Fig. S3. A local zoom view of Fig. 3(h). Inset: a local zoom view of S3.

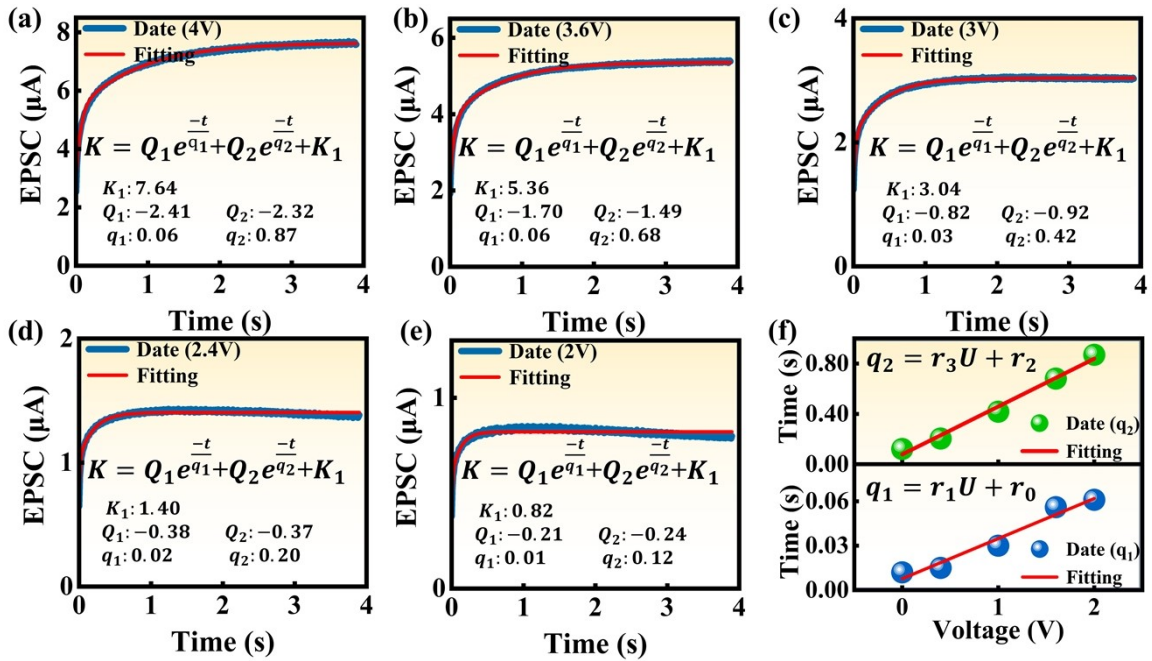

**Supplementary Fig. S4.** The fitting for EPSC of device to continuous multiple pulses with 4 V (a), 3.6 V (b), 3 V (c), 2.4 V (d), and 2 V (e), respectively. (f) The first stage of two-phase sensitivity ( $q_1$ ) and the second stage of two-phase sensitivity ( $q_2$ ) as two functions of the electric amplitude.

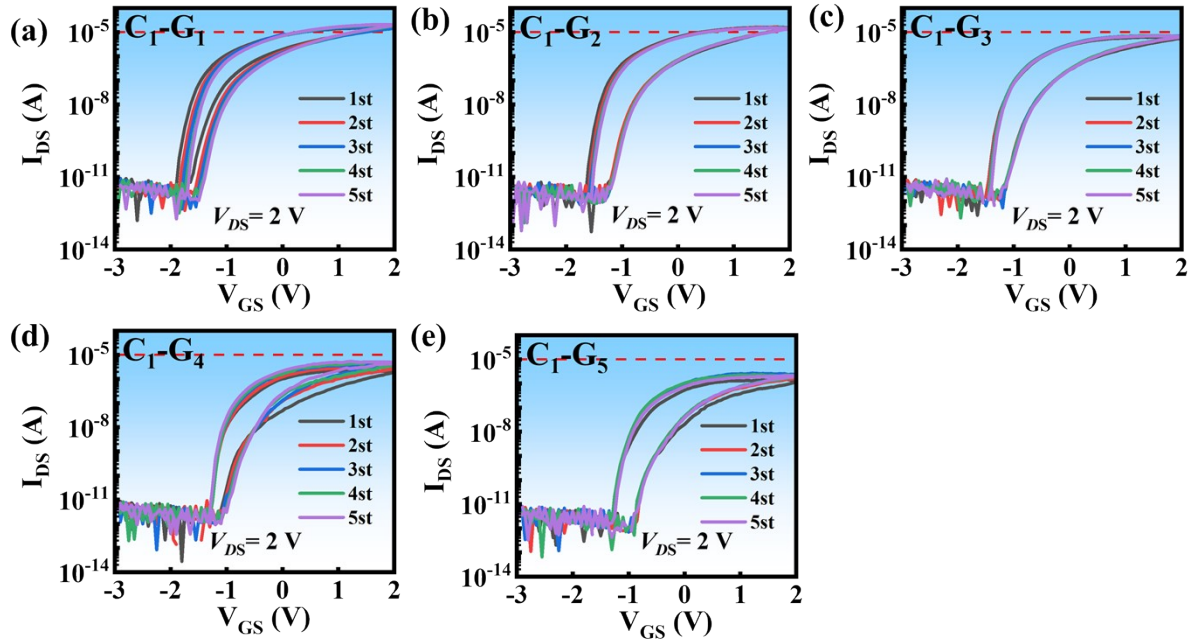

**Supplementary Fig. S5.** The transfer curve of Channel 1 is modulated by different gate terminals ( $G_1 \sim G_5$ ) under the fixed bias of  $V_{DS}=2$  V for five successive measurements. (a) Modulated by  $G_1$ ; (b) Modulated by  $G_2$ ; (c) Modulated by  $G_3$ ; (d) Modulated by  $G_4$ ; (e) Modulated by  $G_5$ .



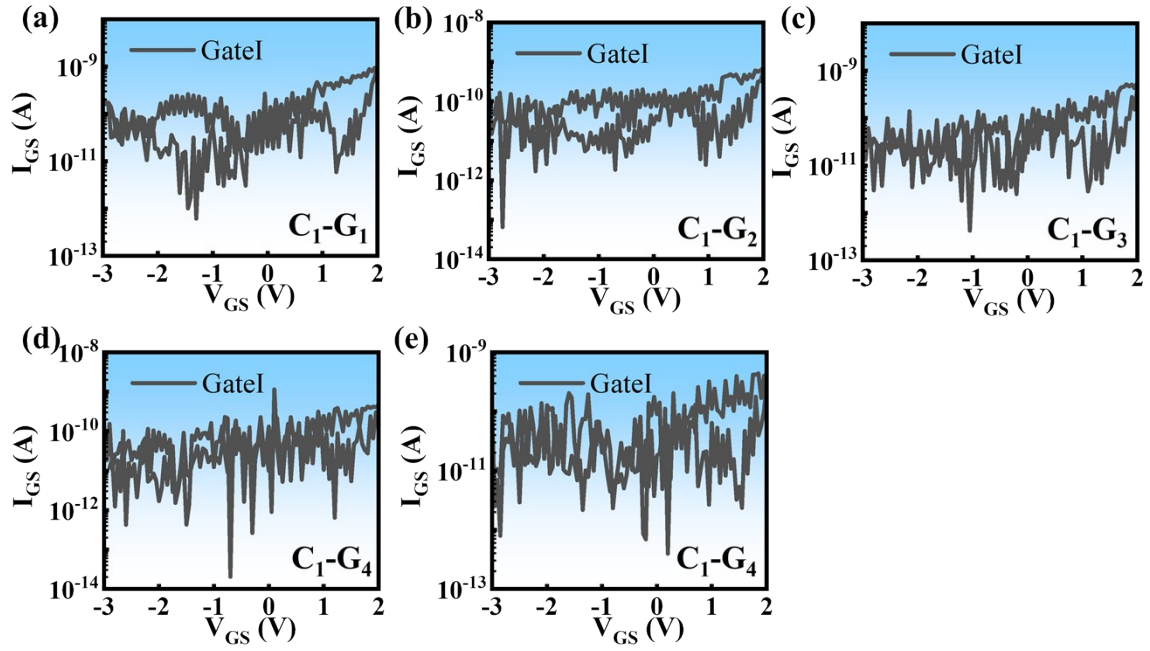

**Supplementary Fig. S6.** The transfer curve of Channel 1 is modulated by different gate terminals ( $G_1 \sim G_5$ ) under the fixed bias of  $V_{DS}=2V$  for five successive measurements. (a) Modulated by  $G_1$ ; (b) Modulated by  $G_2$ ; (c) Modulated by  $G_3$ ; (d) Modulated by  $G_4$ ; (e) Modulated by  $G_5$ .

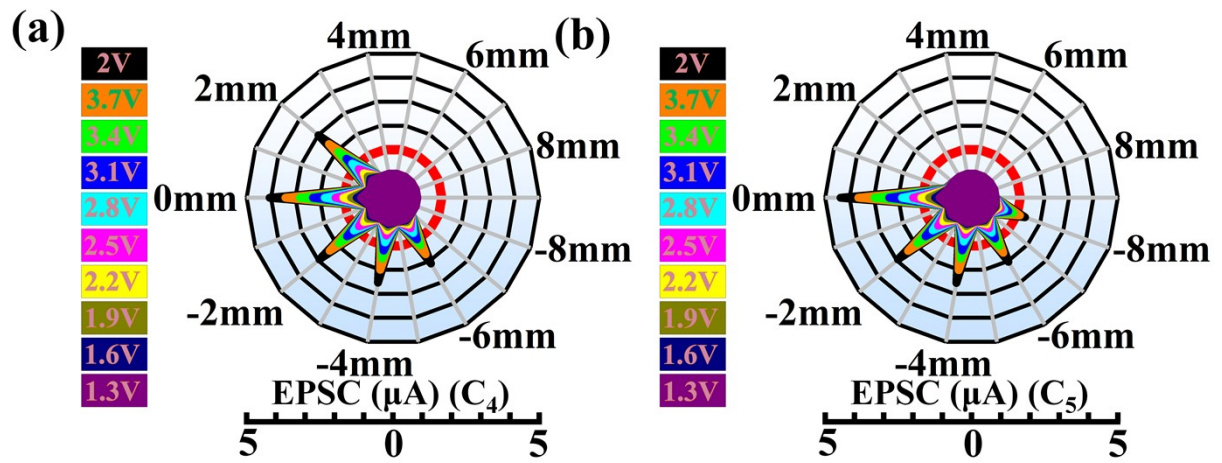

**Supplementary Fig. S7.** (a) The EPSC responses with different projection for Chan-4. (b) The EPSC responses with different projection for Chan-5.

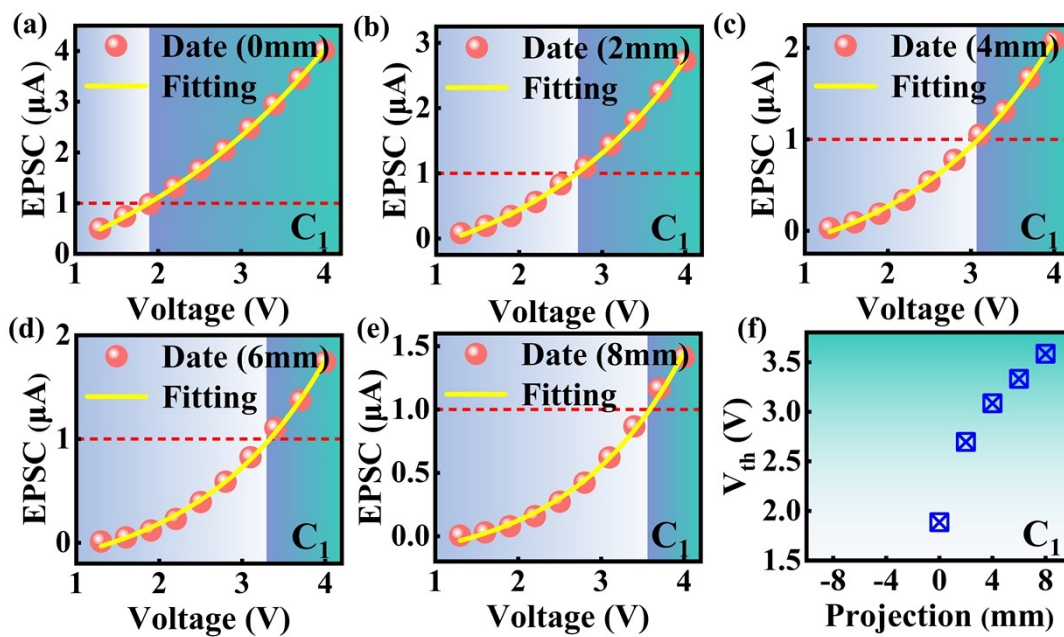

**Supplementary Fig. S8.** EPSC of Chan-1 as a function of voltage under a fixed projection of 0mm (a), 2mm (b), 4mm (c), 6mm (d), and 8mm (e), respectively. (f) The corresponding value of  $V_{th}$  is included by Equation (S1).

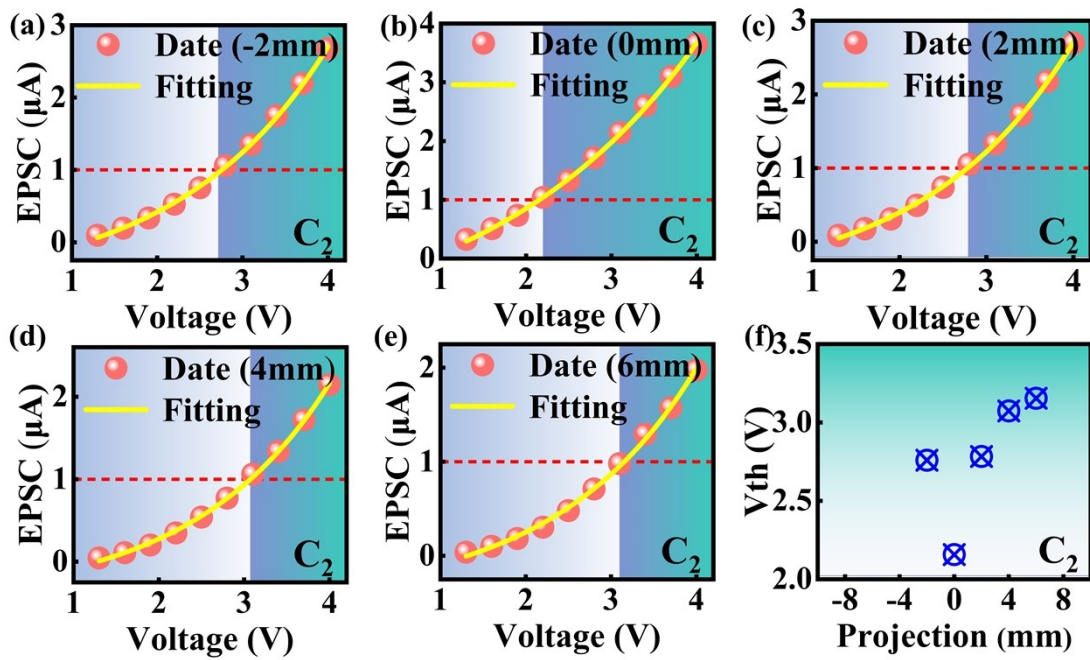

**Supplementary Fig. S9.** EPSC of Chan-2 as a function of voltage under a fixed projection of -2mm (a), 0mm (b), 2mm (c), 4mm (d), and 6mm (e), respectively. (f) The corresponding value of  $V_{th}$  is concluded by Equation (S1).

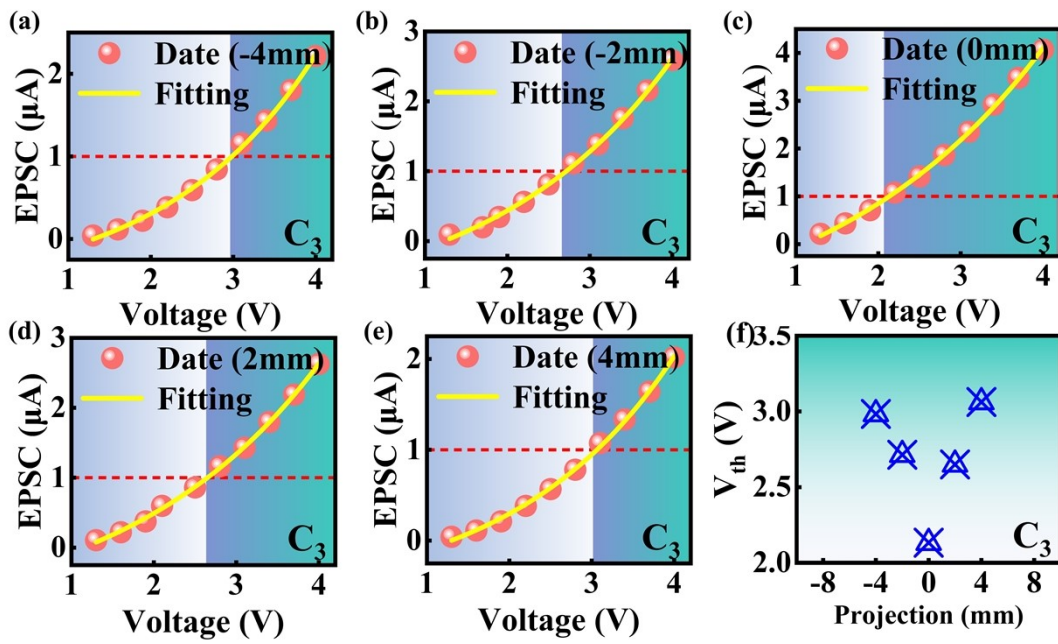

**Supplementary Fig. S10.** EPSC of Chan-3 as a function of voltage under a fixed projection of -4mm (a), -2mm (b), 0mm (c), 2mm (d), and 4mm (e), respectively. (f) The corresponding value of  $V_{th}$  is concluded by Equation (S1).

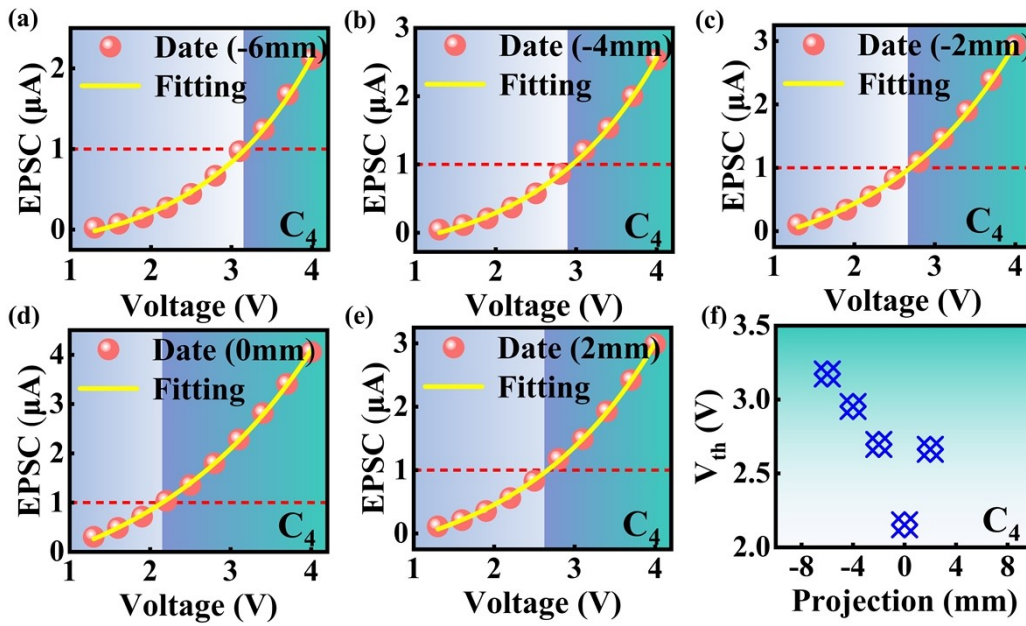

**Supplementary Fig. S11.** EPSC of Chan-4 as a function of voltage under a fixed projection of -6mm (a), -4mm (b), -2mm (c), 0mm (d), and 2mm (e), respectively. (f) The corresponding value of  $V_{th}$  is concluded by Equation (S1).

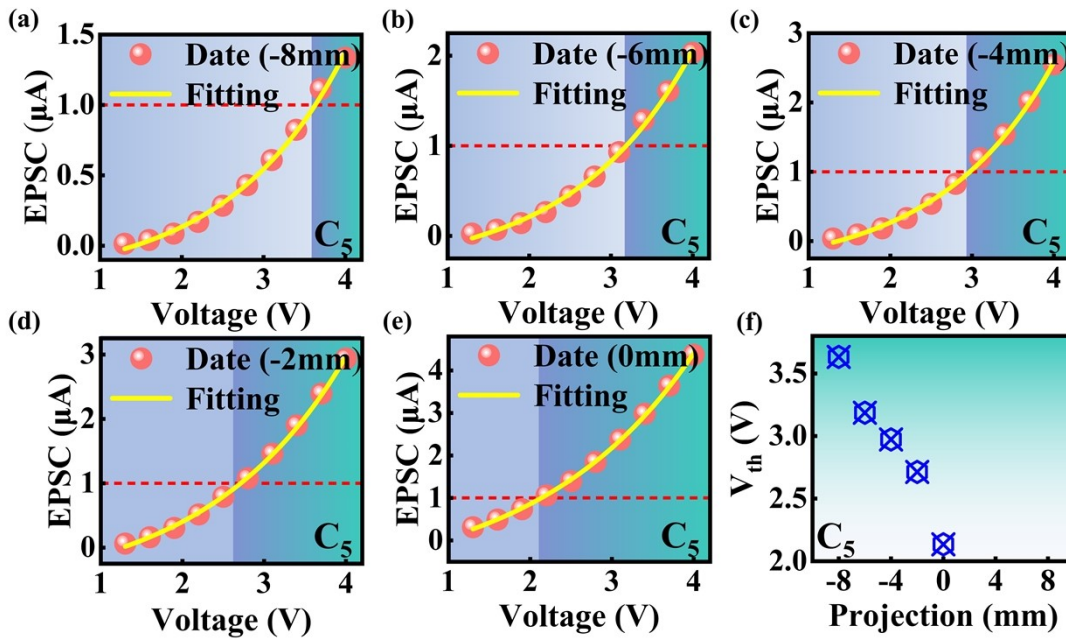

**Supplementary Fig. S12.** EPSC of Chan-5 as a function of voltage under a fixed projection of -8mm (a), -6mm (b), -4mm (c), -2mm (d), and 0mm (e), respectively. (f) The corresponding value of  $V_{th}$  is included by Equation (S1).



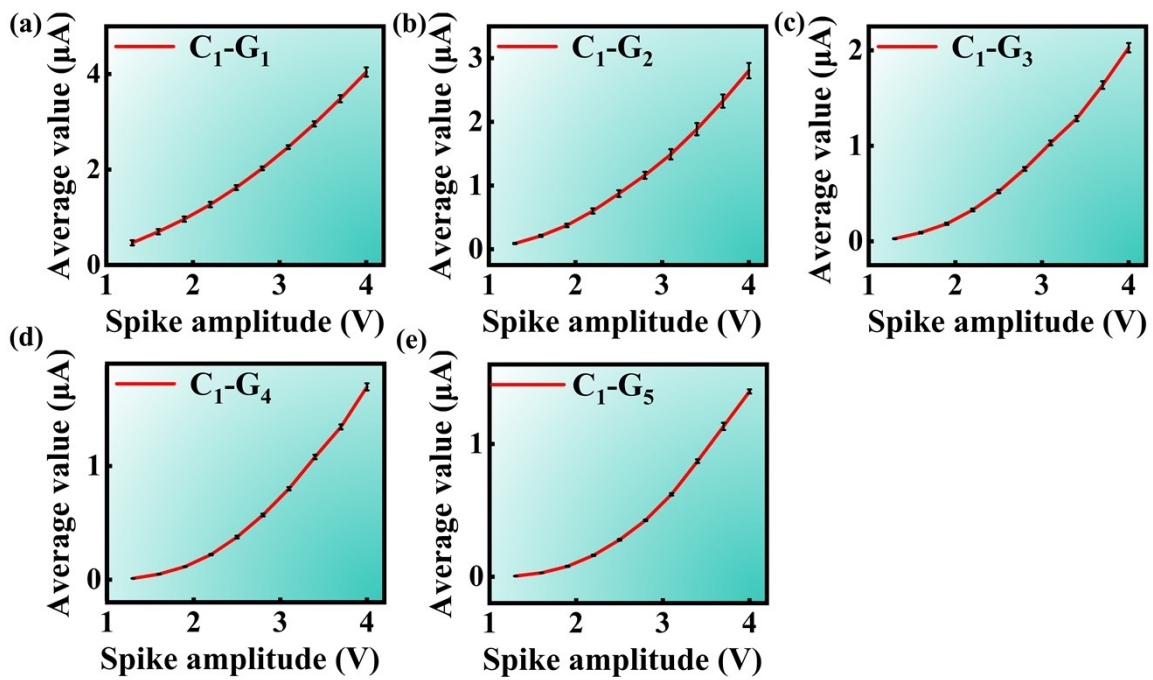

**Supplementary Fig. S13.** The stability of oxide transistor is demonstrated by measuring the EPSC for five successive measurements. (a) The stability of Chan-1 with Gate 1. (b) The stability of Chan-1 with Gate 2. (c) The stability of Chan-1 with Gate 3. (d) The stability of Chan-1 with Gate 4. (e) The stability of Chan-1 with Gate 5.



| $E_1$ | $E_0$ | $\tau_3(\text{s})$ | $H_1$    | $H_0$ | $U_0$ (V) |
|-------|-------|--------------------|----------|-------|-----------|
| 7.94  | 19.29 | 2.89               | -2559.60 | 73.92 | 0.60      |

**Supplementary Table S1.** The fitting results for the different parameters are summarized from Fig. S2.

| <b>Spiking amplitudes (V)</b> | <b>Incubation time (ms)</b> |
|-------------------------------|-----------------------------|
| <b>4</b>                      | <b>3</b>                    |
| <b>3.6</b>                    | <b>5</b>                    |
| <b>3</b>                      | <b>7</b>                    |
| <b>2.4</b>                    | <b>68</b>                   |
| <b>2</b>                      | <b>&gt;7000</b>             |

**Supplementary Table S2.** The incubation time corresponding to different voltage amplitudes.

| <b>Voltage (V)</b> | <b><math>K_1</math></b> | <b><math>Q_1</math></b> | <b><math>Q_2</math></b> | <b><math>q_1</math> (s)</b> | <b><math>q_2</math> (s)</b> |
|--------------------|-------------------------|-------------------------|-------------------------|-----------------------------|-----------------------------|
| <b>4.0</b>         | <b>7.64</b>             | <b>-2.41</b>            | <b>-2.32</b>            | <b>0.06</b>                 | <b>0.87</b>                 |
| <b>3.6</b>         | <b>5.36</b>             | <b>-1.70</b>            | <b>-1.49</b>            | <b>0.06</b>                 | <b>0.68</b>                 |
| <b>3.0</b>         | <b>3.04</b>             | <b>-0.82</b>            | <b>-0.92</b>            | <b>0.03</b>                 | <b>0.42</b>                 |
| <b>2.4</b>         | <b>1.40</b>             | <b>-0.38</b>            | <b>-0.37</b>            | <b>0.02</b>                 | <b>0.20</b>                 |
| <b>2</b>           | <b>0.82</b>             | <b>-0.21</b>            | <b>-0.24</b>            | <b>0.01</b>                 | <b>0.12</b>                 |

**Supplementary Table S3.** The summarized table of the fitting results ( $K_1$ ,  $Q_1$ ,  $Q_2$ ,  $q_1$  and  $q_2$ ) for two-phase sensitivity.

|               | <b>Chan-1</b> | <b>Chan-2</b> | <b>Chan-3</b> | <b>Chan-4</b> | <b>Chan-5</b> |
|---------------|---------------|---------------|---------------|---------------|---------------|
| <b>Gate 1</b> | <b>0</b>      | <b>-2</b>     | <b>-4</b>     | <b>-6</b>     | <b>-8</b>     |
| <b>Gate 2</b> | <b>2</b>      | <b>0</b>      | <b>-2</b>     | <b>-4</b>     | <b>-6</b>     |
| <b>Gate 3</b> | <b>4</b>      | <b>2</b>      | <b>0</b>      | <b>-2</b>     | <b>-4</b>     |
| <b>Gate 4</b> | <b>6</b>      | <b>4</b>      | <b>2</b>      | <b>0</b>      | <b>-2</b>     |
| <b>Gate 5</b> | <b>8</b>      | <b>6</b>      | <b>4</b>      | <b>2</b>      | <b>0</b>      |

**Supplementary Table S4.** The value of the projection formed between the different channels and gates.

## References

- 1 G. Feng, J. Jiang, Y. Zhao, S. Wang, B. Liu, K. Yin, *Adv. Mater.*, 2020, **32**, 1906171.
- 2 G. Feng, J. Jiang, Y. Li, D. Xie, B. Tian, Q. Wan, *Adv. Funct. Mater.*, 2021, **31**, 2104327.
- 3 Z. Zheng, J. Jiang, J. Guo, J. Sun, J. Yang, *Organic Electronics*, 2016, **33**, 311-315.
- 4 W. Hu, J. Jiang, D. Xie, S. Wang, K. Bi, H. Duan, J. Yang, Jun He, *Nanoscale*, 2018, **10**, 14893–14901.
- 5 H. Ikeda, J. Stark, H. Fischer, M. Wagner, R. Drdla, T. Jaeger, Synaptic Amplifier of Inflammatory Pain in the Spinal Dorsal Horn. *Science* 2006, **312**, 1659-1662.
- 6 M. C. Acosta, C. Luna, S. Quirce, C. Belmonte, J. Gallar, *Invest. Ophthalmol. Vis. Sci.* 2014, **5**, 3403-3412.
